# Supplementary material
Source: publisher site journal article supplement (https://www.dovepress.com/article/457381)
Supplement: Supplementary file 1 [file get_supplementary_file.php]

**Table S1 PRISMA 2020 Checklist**

|                               | Item | Checklist item                                                                                                                                                                                                                                                                                       | Location where item is reported |
|-------------------------------|------|------------------------------------------------------------------------------------------------------------------------------------------------------------------------------------------------------------------------------------------------------------------------------------------------------|---------------------------------|
| <b>TITLE</b>                  |      |                                                                                                                                                                                                                                                                                                      |                                 |
| Title                         | 1    | Identify the report as a systematic review.                                                                                                                                                                                                                                                          | 1                               |
| <b>ABSTRACT</b>               |      |                                                                                                                                                                                                                                                                                                      |                                 |
| Abstract                      | 2    | See the PRISMA 2020 for Abstracts checklist.                                                                                                                                                                                                                                                         | 3                               |
| <b>INTRODUCTION</b>           |      |                                                                                                                                                                                                                                                                                                      |                                 |
| Rationale                     | 3    | Describe the rationale for the review in the context of existing knowledge.                                                                                                                                                                                                                          | 4                               |
| Objectives                    | 4    | Provide an explicit statement of the objective(s) or question(s) the review addresses.                                                                                                                                                                                                               | 5                               |
| <b>METHODS</b>                |      |                                                                                                                                                                                                                                                                                                      |                                 |
| Eligibility criteria          | 5    | Specify the inclusion and exclusion criteria for the review and how studies were grouped for the syntheses.                                                                                                                                                                                          | 6                               |
| Information sources           | 6    | Specify all databases, registers, websites, organisations, reference lists and other sources searched or consulted to identify studies. Specify the date when each source was last searched or consulted.                                                                                            | 6                               |
| Search strategy               | 7    | Present the full search strategies for all databases, registers and websites, including any filters and limits used.                                                                                                                                                                                 | 6                               |
| Selection process             | 8    | Specify the methods used to decide whether a study met the inclusion criteria of the review, including how many reviewers screened each record and each report retrieved, whether they worked independently, and if applicable, details of automation tools used in the process.                     | 8                               |
| Data collection process       | 9    | Specify the methods used to collect data from reports, including how many reviewers collected data from each report, whether they worked independently, any processes for obtaining or confirming data from study investigators, and if applicable, details of automation tools used in the process. | 8                               |
| Data items                    | 10a  | List and define all outcomes for which data were sought. Specify whether all results that were compatible with each outcome domain in each study were sought (e.g. for all measures, time points, analyses), and if not, the methods used to decide which results to collect.                        | 8                               |
|                               | 10b  | List and define all other variables for which data were sought (e.g. participant and intervention characteristics, funding sources). Describe any assumptions made about any missing or unclear information.                                                                                         | 6-8                             |
| Study risk of bias assessment | 11   | Specify the methods used to assess risk of bias in the included studies, including details of the tool(s) used, how many reviewers assessed each study and whether they worked                                                                                                                       | 9                               |

**Table S1 PRISMA 2020 Checklist**

|                           | Item | Checklist item                                                                                                                                                                                                                                              | Location where item is reported |
|---------------------------|------|-------------------------------------------------------------------------------------------------------------------------------------------------------------------------------------------------------------------------------------------------------------|---------------------------------|
|                           |      | independently, and if applicable, details of automation tools used in the process.                                                                                                                                                                          |                                 |
| Effect measures           | 12   | Specify for each outcome the effect measure(s) (e.g. risk ratio, mean difference) used in the synthesis or presentation of results.                                                                                                                         | 10                              |
| Synthesis methods         | 13a  | Describe the processes used to decide which studies were eligible for each synthesis (e.g. tabulating the study intervention characteristics and comparing against the planned groups for each synthesis (item #5)).                                        | 10                              |
|                           | 13b  | Describe any methods required to prepare the data for presentation or synthesis, such as handling of missing summary statistics, or data conversions.                                                                                                       | 10                              |
|                           | 13c  | Describe any methods used to tabulate or visually display results of individual studies and syntheses.                                                                                                                                                      | 11                              |
|                           | 13d  | Describe any methods used to synthesize results and provide a rationale for the choice(s). If meta-analysis was performed, describe the model(s), method(s) to identify the presence and extent of statistical heterogeneity, and software package(s) used. | 10                              |
|                           | 13e  | Describe any methods used to explore possible causes of heterogeneity among study results (e.g. subgroup analysis, meta-regression).                                                                                                                        | 10                              |
|                           | 13f  | Describe any sensitivity analyses conducted to assess robustness of the synthesized results.                                                                                                                                                                | 10                              |
| Reporting bias assessment | 14   | Describe any methods used to assess risk of bias due to missing results in a synthesis (arising from reporting biases).                                                                                                                                     | 10                              |
| Certainty assessment      | 15   | Describe any methods used to assess certainty (or confidence) in the body of evidence for an outcome.                                                                                                                                                       | 9                               |
| <b>RESULTS</b>            |      |                                                                                                                                                                                                                                                             |                                 |
| Study selection           | 16a  | Describe the results of the search and selection process, from the number of records identified in the search to the number of studies included in the review, ideally using a flow diagram.                                                                | 11                              |
|                           | 16b  | Cite studies that might appear to meet the inclusion criteria, but which were excluded, and explain why they were excluded.                                                                                                                                 | Figure 1                        |
| Study characteristics     | 17   | Cite each included study and present its characteristics.                                                                                                                                                                                                   | Table1<br>Table2                |
| Risk of bias in studies   | 18   | Present assessments of risk of bias for each included study.                                                                                                                                                                                                | 13                              |

**Table S1 PRISMA 2020 Checklist**

|                               | Item | Checklist item                                                                                                                                                                                                                                                                       | Location where item is reported |
|-------------------------------|------|--------------------------------------------------------------------------------------------------------------------------------------------------------------------------------------------------------------------------------------------------------------------------------------|---------------------------------|
| Results of individual studies | 19   | For all outcomes, present, for each study: (a) summary statistics for each group (where appropriate) and (b) an effect estimate and its precision (e.g. confidence/credible interval), ideally using structured tables or plots.                                                     | 13-18                           |
| Results of syntheses          | 20a  | For each synthesis, briefly summarise the characteristics and risk of bias among contributing studies.                                                                                                                                                                               | 13-18                           |
|                               | 20b  | Present results of all statistical syntheses conducted. If meta-analysis was done, present for each the summary estimate and its precision (e.g. confidence/credible interval) and measures of statistical heterogeneity. If comparing groups, describe the direction of the effect. | 13-18                           |
|                               | 20c  | Present results of all investigations of possible causes of heterogeneity among study results.                                                                                                                                                                                       | 13-18                           |
|                               | 20d  | Present results of all sensitivity analyses conducted to assess the robustness of the synthesized results.                                                                                                                                                                           | Table S3                        |
| Reporting biases              | 21   | Present assessments of risk of bias due to missing results (arising from reporting biases) for each synthesis assessed.                                                                                                                                                              | 19                              |
| Certainty of evidence         | 22   | Present assessments of certainty (or confidence) in the body of evidence for each outcome assessed.                                                                                                                                                                                  | 18-Table 3                      |
| <b>DISCUSSION</b>             |      |                                                                                                                                                                                                                                                                                      |                                 |
| Discussion                    | 23a  | Provide a general interpretation of the results in the context of other evidence.                                                                                                                                                                                                    | 20-22                           |
|                               | 23b  | Discuss any limitations of the evidence included in the review.                                                                                                                                                                                                                      | 23                              |
|                               | 23c  | Discuss any limitations of the review processes used.                                                                                                                                                                                                                                | 23                              |
|                               | 23d  | Discuss implications of the results for practice, policy, and future research.                                                                                                                                                                                                       | 24                              |
| <b>OTHER INFORMATION</b>      |      |                                                                                                                                                                                                                                                                                      |                                 |
| Registration and protocol     | 24a  | Provide registration information for the review, including register name and registration number, or state that the review was not registered.                                                                                                                                       | 6                               |
|                               | 24b  | Indicate where the review protocol can be accessed, or state that a protocol was not prepared.                                                                                                                                                                                       | 6                               |
|                               | 24c  | Describe and explain any amendments to information provided at registration or in the protocol.                                                                                                                                                                                      | -                               |
| Support                       | 25   | Describe sources of financial or non-financial support for the review, and the role of the funders or sponsors in the review.                                                                                                                                                        | 27                              |

**Table S1 PRISMA 2020 Checklist**

|                                                | Item | Checklist item                                                                                                                                                                                                                             | Location where item is reported |
|------------------------------------------------|------|--------------------------------------------------------------------------------------------------------------------------------------------------------------------------------------------------------------------------------------------|---------------------------------|
| Competing interests                            | 26   | Declare any competing interests of review authors.                                                                                                                                                                                         | 27                              |
| Availability of data, code and other materials | 27   | Report which of the following are publicly available and where they can be found: template data collection forms; data extracted from included studies; data used for all analyses; analytic code; any other materials used in the review. | -                               |

From: Page MJ, McKenzie JE, Bossuyt PM, Boutron I, Hoffmann TC, Mulrow CD, et al. The PRISMA 2020 statement: an updated guideline for reporting systematic reviews. **BMJ** 2021;372:n71. doi: 10.1136/bmj.n71



**Table S2 The search strategies of electronic database**

| Database       | Search strategies                                                                                                                                                                                                                                                                                                                                                                                                                                                                                                                                                                                                                                                                                                                                                                                                                                                                                                                                                                                                                                                                                                                                                                                                                                                                                                                                                                                                                                                                                                                                                                                                                                                                                                                                                                                                                                                                                                                                                                                                                                                                                                                                                                                                                                                                                                                                                                          | Results to Jan, 2023 |
|----------------|--------------------------------------------------------------------------------------------------------------------------------------------------------------------------------------------------------------------------------------------------------------------------------------------------------------------------------------------------------------------------------------------------------------------------------------------------------------------------------------------------------------------------------------------------------------------------------------------------------------------------------------------------------------------------------------------------------------------------------------------------------------------------------------------------------------------------------------------------------------------------------------------------------------------------------------------------------------------------------------------------------------------------------------------------------------------------------------------------------------------------------------------------------------------------------------------------------------------------------------------------------------------------------------------------------------------------------------------------------------------------------------------------------------------------------------------------------------------------------------------------------------------------------------------------------------------------------------------------------------------------------------------------------------------------------------------------------------------------------------------------------------------------------------------------------------------------------------------------------------------------------------------------------------------------------------------------------------------------------------------------------------------------------------------------------------------------------------------------------------------------------------------------------------------------------------------------------------------------------------------------------------------------------------------------------------------------------------------------------------------------------------------|----------------------|
|                | <p>#6 #5 OR #4</p> <p>#7 (randomized controlled trial[pt] OR controlled clinical trial[pt] OR randomized[tiab] OR placebo[tiab] OR drug therapy[sh] OR randomly[tiab] OR trial[tiab] OR groups[tiab]) NOT (animals[mh] NOT humans[mh])</p> <p>#8 #7 AND #6 AND #5</p>                                                                                                                                                                                                                                                                                                                                                                                                                                                                                                                                                                                                                                                                                                                                                                                                                                                                                                                                                                                                                                                                                                                                                                                                                                                                                                                                                                                                                                                                                                                                                                                                                                                                                                                                                                                                                                                                                                                                                                                                                                                                                                                      |                      |
| Embase         | <p>#1 'acupressur':ab,ti,kw OR 'acupressure':ab,ti,kw OR 'bowen therapy':ab,ti,kw OR 'chih ya':ab,ti,kw OR 'chiropractic':ab,ti,kw OR 'chiropractic manipulative therapy':ab,ti,kw OR 'chuna':ab,ti,kw OR 'cmt':ab,ti,kw OR 'cranial-sacral therapy':ab,ti,kw OR 'cst':ab,ti,kw OR 'high velocity low amplitude thrust':ab,ti,kw OR 'hvla':ab,ti,kw OR 'instrument-assisted manipulation':ab,ti,kw OR 'manipulative therapy':ab,ti,kw OR 'manual treatment':ab,ti,kw OR 'massage':ab,ti,kw OR 'massage therapies':ab,ti,kw OR 'massage therapy':ab,ti,kw OR 'massotherapy':ab,ti,kw OR 'mobilisation':ab,ti,kw OR 'mobilization':ab,ti,kw OR 'mt':ab,ti,kw OR 'myofascial release':ab,ti,kw OR 'myotherapy':ab,ti,kw OR 'omt':ab,ti,kw OR 'osteopathic manipulation':ab,ti,kw OR 'osteopathic manipulative therapy':ab,ti,kw OR 'osteopathic manipulative treatment':ab,ti,kw OR 'osteopathic manipulative treatments':ab,ti,kw OR 'osteopathy':ab,ti,kw OR 'reflexology':ab,ti,kw OR 'remedial therapy':ab,ti,kw OR 'rolfing':ab,ti,kw OR 'shiatsu':ab,ti,kw OR 'shiatzu':ab,ti,kw OR 'smt':ab,ti,kw OR 'spinal adjustment':ab,ti,kw OR 'spinal manipulative therapy':ab,ti,kw OR 'spine adjustment':ab,ti,kw OR 'sterearthrolysis':ab,ti,kw OR 'therapies, zone':ab,ti,kw OR 'touch therapy':ab,ti,kw OR 'touching therapy':ab,ti,kw OR 'trigger point':ab,ti,kw OR 'tui na':ab,ti,kw OR 'tuina':ab,ti,kw OR 'visceral osteopathic manipulation':ab,ti,kw OR 'zhi ya':ab,ti,kw OR 'zone therapy':ab,ti,kw</p> <p>#2 'dysmenorrheas':ab,ti,kw OR 'menstrual pain':ab,ti,kw OR 'dysmenorrhea':ab,ti,kw OR 'primary dysmenorrhea':ab,ti,kw OR 'menstrual cramps':ab,ti,kw OR 'period pain':ab,ti,kw OR 'pelvic pain':ab,ti,kw OR 'painful period':ab,ti,kw OR 'menstrual disorder':ab,ti,kw OR 'uterine contraction':ab,ti,kw OR 'pd':ab,ti,kw OR 'menstrual pains':ab,ti,kw OR 'painful menstruation':ab,ti,kw OR 'painful menstruations':ab,ti,kw</p> <p>#3 'crossover procedure':de OR 'double-blind procedure':de OR 'randomized controlled trial':de OR 'single-blind procedure':de OR random*:de,ab,ti OR factorial*:de,ab,ti OR crossover*:de,ab,ti OR ((cross NEXT/1 over*):de,ab,ti) OR placebo*:de,ab,ti OR ((doubl* NEAR/1 blind*):de,ab,ti) OR ((singl* NEAR/1 blind*):de,ab,ti) OR assign*:de,ab,ti OR allocat*:de,ab,ti OR volunteer*:de,ab,ti</p> <p>#4 #1 AND #2 AND #3</p> | 483                  |
| Web of Science | <p>TS=(acupressur OR acupressure OR bowen therapy OR chih ya OR chiropractic OR chiropractic manipulative therapy OR chuna OR cmt OR cranial-sacral therapy OR cst OR high velocity low amplitude thrust OR hvla OR instrument-assisted manipulation OR manipulative therapy OR manual treatment</p>                                                                                                                                                                                                                                                                                                                                                                                                                                                                                                                                                                                                                                                                                                                                                                                                                                                                                                                                                                                                                                                                                                                                                                                                                                                                                                                                                                                                                                                                                                                                                                                                                                                                                                                                                                                                                                                                                                                                                                                                                                                                                       | 2920                 |

**Table S2 The search strategies of electronic database**

| Database | Search strategies                                                                                                                                                                                                                                                                                                                                                                                                                                                                                                                                                                                                                                                                                                                                                                                                                                                                                                                                                                                                                                                                                                                                                                                                                                                                                                                                                                                                                                                                                                                                                                                                                                 | Results to Jan, 2023 |
|----------|---------------------------------------------------------------------------------------------------------------------------------------------------------------------------------------------------------------------------------------------------------------------------------------------------------------------------------------------------------------------------------------------------------------------------------------------------------------------------------------------------------------------------------------------------------------------------------------------------------------------------------------------------------------------------------------------------------------------------------------------------------------------------------------------------------------------------------------------------------------------------------------------------------------------------------------------------------------------------------------------------------------------------------------------------------------------------------------------------------------------------------------------------------------------------------------------------------------------------------------------------------------------------------------------------------------------------------------------------------------------------------------------------------------------------------------------------------------------------------------------------------------------------------------------------------------------------------------------------------------------------------------------------|----------------------|
|          | <p>OR massage OR massage therapies OR massage therapy OR massotherapy OR mobilisation OR mobilization OR mt OR myofascial release OR myotherapy OR omt OR osteopathic manipulation OR osteopathic manipulative therapy OR osteopathic manipulative treatment OR osteopathic manipulative treatments OR osteopathy OR reflexology OR remedial therapy OR rolfing OR shiatsu OR shiatzu OR smt OR spinal adjustment OR spinal manipulative therapy OR spine adjustment OR stereoarthrolysis OR therapies, zone OR touch therapy OR touching therapy OR trigger point OR tui na OR tuina OR visceral osteopathic manipulation OR zhi ya OR zone therapy) AND TS=(dysmenorrheas OR menstrual pain OR dysmenorrhea OR primary dysmenorrhea OR menstrual cramps OR period pain OR pelvic pain OR painful period OR menstrual disorder OR uterine contraction OR PD OR menstrual pains OR painful menstruation OR painful menstruations) AND TS=(randomized controlled trial OR quasi-randomized controlled trial OR controlled clinical trial OR randomized OR randomly OR Randomization OR RCT OR trial OR groups OR allocated OR blind procedure OR Crossover procedure OR Placebo OR Single blind OR Double blind OR blind)</p>                                                                                                                                                                                                                                                                                                                                                                                                                      |                      |
| CoChrane | <p>#1 ("dysmenrheas" OR "menstrual pain" OR "dysmenrhea" OR "primary dysmenrhea" OR "menstrual cramps" OR "period pain" OR "pelvic pain" OR "painful period" OR "menstrual disorder" OR "Uterine contraction" OR "PD" OR "Menstrual Pains" OR "Painful Menstruation" OR "Painful Menstruations"):ti,ab,kw</p> <p>#2 ("Acupressur" OR "acupressure" OR "Bowen therapy" OR "Chih Ya" OR "chiropractic" OR "Chiropractic Manipulative Therapy" OR "chuna" OR "CMT" OR "Cranial-Sacral Therapy" OR "CST" OR "high velocity low amplitude thrust" OR "HVLA" OR "Instrument-assisted manipulation" OR "manipulative therapy" OR "manipulative therapy" OR "manual treatment" OR "Massage" OR "Massage Therapies" OR "Massage Therapy" OR "Massotherapy" OR "mobilisation" OR "mobilization" OR "MT" OR "myofascial release" OR "myotherapy" OR "OMT" OR "Osteopathic Manipulation" OR "Osteopathic Manipulative Therapy" OR "Osteopathic Manipulative Treatment" OR "Osteopathic Manipulative Treatments" OR "osteopathy" OR "reflexology" OR "remedial therapy" OR "rolfing" OR "Shiatsu" OR "Shiatzu" OR "SMT" OR "Spinal Adjustment" OR "Spinal Manipulative Therapy" OR "Spine Adjustment" OR "stereoarthrolysis" OR "Therapies, Zone" OR "touch therapy" OR "touching therapy" OR "trigger point" OR "Tui Na" OR "tuina" OR "Visceral Osteopathic Manipulation" OR "Zhi Ya" OR "Zone Therapy"):ti,ab,kw</p> <p>#3 ("randomized controlled trial" OR "quasi-randomized controlled trial" OR "controlled clinical trial" OR "randomized" OR "randomly" OR "Randomization" OR "RCT" OR "trial" OR "groups" OR "allocated" OR "blind procedure" OR</p> | 526                  |

**Table S2 The search strategies of electronic database**

| Database                                           | Search strategies                                                                                                                                                                                                                                                                                                                                                                                                                                                                                                                                                                                                                                                                                                                                                                                                                                                                                                                                                                                                                                                                                                                                                                                                                                                                                                     | Results to Jan, 2023 |
|----------------------------------------------------|-----------------------------------------------------------------------------------------------------------------------------------------------------------------------------------------------------------------------------------------------------------------------------------------------------------------------------------------------------------------------------------------------------------------------------------------------------------------------------------------------------------------------------------------------------------------------------------------------------------------------------------------------------------------------------------------------------------------------------------------------------------------------------------------------------------------------------------------------------------------------------------------------------------------------------------------------------------------------------------------------------------------------------------------------------------------------------------------------------------------------------------------------------------------------------------------------------------------------------------------------------------------------------------------------------------------------|----------------------|
|                                                    | <p>"Crossover procedure" OR "Placebo" OR "Single blind" OR "Double blind" OR "blind"):ti,ab,kw<br/>#1+#2+#3</p>                                                                                                                                                                                                                                                                                                                                                                                                                                                                                                                                                                                                                                                                                                                                                                                                                                                                                                                                                                                                                                                                                                                                                                                                       |                      |
| <p><b>SNIOMED</b></p>                              | <p>1 "月经痛" [标题:智能] OR "痛经" [标题:智能] OR "经期疼痛" [标题:智能] OR "原发性痛经" [标题:智能] OR "月经痛" [摘要:智能] OR "痛经" [摘要:智能] OR "经期疼痛" [摘要:智能] OR "原发性痛经" [摘要:智能]</p> <p>2 (("推拿"[摘要:智能] OR "手法"[摘要:智能] OR "推拿治疗"[摘要:智能] OR "手法治疗"[摘要:智能] OR "按摩"[摘要:智能] OR "按摩治疗"[摘要:智能] OR "一指禅"[摘要:智能] OR "点穴"[摘要:智能] OR "膏摩"[摘要:智能] OR "按揉法"[摘要:智能] OR "掌振法"[摘要:智能] OR "指拨法"[摘要:智能] OR "正骨"[摘要:智能] OR "推扳法"[摘要:智能] OR "关节松解术"[摘要:智能] OR "关节松动术"[摘要:智能] OR "关节拉伸"[摘要:智能] OR "颅底椎技术"[摘要:智能] OR "高速低振幅"[摘要:智能] OR "整脊"[摘要:智能] OR "捏脊"[摘要:智能]) OR ("推拿"[标题:智能] OR "手法"[标题:智能] OR "推拿治疗"[标题:智能] OR "手法治疗"[标题:智能] OR "按摩"[标题:智能] OR "按摩治疗"[标题:智能] OR "一指禅"[标题:智能] OR "点穴"[标题:智能] OR "膏摩"[标题:智能] OR "按揉法"[标题:智能] OR "掌振法"[标题:智能] OR "指拨法"[标题:智能] OR "正骨"[标题:智能] OR "推扳法"[标题:智能] OR "关节松解术"[标题:智能] OR "关节松动术"[标题:智能] OR "关节拉伸"[标题:智能] OR "颅底椎技术"[标题:智能] OR "高速低振幅"[标题:智能] OR "整脊"[标题:智能] OR "捏脊"[标题:智能]))</p> <p>3 "对照"[标题:智能] OR "随机"[标题:智能] OR "半随机"[标题:智能] OR "试验组"[标题:智能] OR "实验组"[标题:智能] OR "干预组"[标题:智能] OR "分组"[标题:智能] OR "两组"[标题:智能] OR "三组"[标题:智能] OR "组间"[标题:智能] OR "观察"[标题:智能] OR "临床"[标题:智能] OR "例"[标题:智能] OR "对照"[摘要:智能] OR "随机"[摘要:智能] OR "半随机"[摘要:智能] OR "试验组"[摘要:智能] OR "实验组"[摘要:智能] OR "干预组"[摘要:智能] OR "分组"[摘要:智能] OR "两组"[摘要:智能] OR "三组"[摘要:智能] OR "组间"[摘要:智能] OR "观察"[摘要:智能] OR "临床"[摘要:智能] OR "例"[摘要:智能]</p> <p>(#3) AND (#2) AND (#1)</p> | <p>382</p>           |
| <p><b>SNIOMED<br/>(Translated<br/>Version)</b></p> | <p>1 "Menstrual Pain" [Title: Smart] OR "Dysmenorrhea" [Title: Smart] OR "Menstrual Period Pain" [Title: Smart] OR "Primary Dysmenorrhea" [Title: Smart] OR "Menstrual Pain" [Abstract: Smart] OR "Dysmenorrhea" [Abstract: Smart] OR "Menstrual Period Pain" [Abstract: Smart] OR "Primary Dysmenorrhea" [Abstract: Smart]</p> <p>2 (("Massage" [Abstract: Smart] OR "Manipulation" [Abstract: Smart] OR "Massage Therapy" [Abstract: Smart] OR "Manipulative Therapy" [Abstract: Smart] OR "Rubbing" [Abstract: Smart] OR "Massage Treatment" [Abstract: Smart] OR "Finger Zen" [Abstract: Smart] OR "Acupoint" [Abstract: Smart] OR "Ointment Rubbing" [Abstract: Smart] OR "Rubbing Technique" [Abstract: Smart] OR "Palm Vibration Technique" [Abstract: Smart] OR "Finger Pressing</p>                                                                                                                                                                                                                                                                                                                                                                                                                                                                                                                          | <p>382</p>           |



**Table S2 The search strategies of electronic database**

| Database | Search strategies                                                                                                                                                                                                                                                                                                                                                                                                                                                                                                                                                                                                                                                                                                                                                                                                                                                                                                                                                                                                                                                                                                                                                                                                                                                                                                                                                                                                                                                                                                                                                                                                                                                                                                                                                                                                                                                                                                                                                                                                                                                                                                                                                                                                           | Results to Jan, 2023 |
|----------|-----------------------------------------------------------------------------------------------------------------------------------------------------------------------------------------------------------------------------------------------------------------------------------------------------------------------------------------------------------------------------------------------------------------------------------------------------------------------------------------------------------------------------------------------------------------------------------------------------------------------------------------------------------------------------------------------------------------------------------------------------------------------------------------------------------------------------------------------------------------------------------------------------------------------------------------------------------------------------------------------------------------------------------------------------------------------------------------------------------------------------------------------------------------------------------------------------------------------------------------------------------------------------------------------------------------------------------------------------------------------------------------------------------------------------------------------------------------------------------------------------------------------------------------------------------------------------------------------------------------------------------------------------------------------------------------------------------------------------------------------------------------------------------------------------------------------------------------------------------------------------------------------------------------------------------------------------------------------------------------------------------------------------------------------------------------------------------------------------------------------------------------------------------------------------------------------------------------------------|----------------------|
|          | <p>Technique" [Abstract: Smart] OR "Orthopedics" [Abstract: Smart] OR "Push-Pull Technique" [Abstract: Smart] OR "Joint Loosening Procedure" [Abstract: Smart] OR "Joint Mobilization Procedure" [Abstract: Smart] OR "Joint Stretching" [Abstract: Smart] OR "Suboccipital Technique" [Abstract: Smart] OR "High-Speed Low-Amplitude" [Abstract: Smart] OR "Chiropractic Adjustment" [Abstract: Smart] OR "Spinal Pinching" [Abstract: Smart]) OR ("Massage" [Title: Smart] OR "Manipulation" [Title: Smart] OR "Massage Therapy" [Title: Smart] OR "Manipulative Therapy" [Title: Smart] OR "Rubbing" [Title: Smart] OR "Massage Treatment" [Title: Smart] OR "Finger Zen" [Title: Smart] OR "Acupoint" [Title: Smart] OR "Ointment Rubbing" [Title: Smart] OR "Rubbing Technique" [Title: Smart] OR "Palm Vibration Technique" [Title: Smart] OR "Finger Pressing Technique" [Title: Smart] OR "Orthopedics" [Title: Smart] OR "Push-Pull Technique" [Title: Smart] OR "Joint Loosening Procedure" [Title: Smart] OR "Joint Mobilization Procedure" [Title: Smart] OR "Joint Stretching" [Title: Smart] OR "Suboccipital Technique" [Title: Smart] OR "High-Speed Low-Amplitude" [Title: Smart] OR "Chiropractic Adjustment" [Title: Smart] OR "Spinal Pinching" [Title: Smart]))</p> <p>3 "Control" [Title: Smart] OR "Random" [Title: Smart] OR "Semi-Random" [Title: Smart] OR "Experimental Group" [Title: Smart] OR "Intervention Group" [Title: Smart] OR "Treatment Group" [Title: Smart] OR "Grouping" [Title: Smart] OR "Two Groups" [Title: Smart] OR "Three Groups" [Title: Smart] OR "Inter-group" [Title: Smart] OR "Observation" [Title: Smart] OR "Clinical" [Title: Smart] OR "Case" [Title: Smart] OR "Control" [Abstract: Smart] OR "Random" [Abstract: Smart] OR "Semi-Random" [Abstract: Smart] OR "Experimental Group" [Abstract: Smart] OR "Intervention Group" [Abstract: Smart] OR "Treatment Group" [Abstract: Smart] OR "Grouping" [Abstract: Smart] OR "Two Groups" [Abstract: Smart] OR "Three Groups" [Abstract: Smart] OR "Inter-group" [Abstract: Smart] OR "Observation" [Abstract: Smart] OR "Clinical" [Abstract: Smart] OR "Case" [Abstract: Smart]</p> <p>(#3) AND (#2) AND (#1)</p> |                      |
| WanFang  | <p>(主题:(“痛经” or “月经痛” or “原发性痛经” or “经期疼痛”) AND 主题:(“对照” or “随机” or “半随机” or “实验组” or “干预组” or “实验组” or “实验组” or “分组” or “两组” or “组间” or “观察” or “临床” or “例”) AND 主题:(“推拿” or “手法” or “按摩” or “一指禅” or “点穴” or “膏摩” or “按揉法” or “掌振法” or “指拨法” or “正骨” or “推扳法” or “关节松解术” or “关节松动术” or “关节拉伸” or “颅底椎技术” or “高速低振幅” or “整脊” or “捏脊” or “手法治疗”)) OR (题名或关键词:(“痛经” or “月经痛” or “原发性痛经” or “经期疼痛”) AND 题名或关键词:(“对照” or “随机” or “半随机” or “实验组” or “干预组” or “实验组” or “实验组” or “分组” or “两组” or “组间” or “观察” or “临床” or “例”) AND 题名或关键词:(“推拿” or “手法” or “按摩” or “一指禅” or “点穴” or “膏摩” or “按揉法”</p>                                                                                                                                                                                                                                                                                                                                                                                                                                                                                                                                                                                                                                                                                                                                                                                                                                                                                                                                                                                                                                                                                                                                                                                                                                                                                                                                                                                                                                                                                                                                                                                                                              | 588                  |

**Table S2 The search strategies of electronic database**

| Database                        | Search strategies                                                                                                                                                                                                                                                                                                                                                                                                                                                                                                                                                                                                                                                                                                                                                                                                                                                                                                                                                                                                                                                                                                                                                                                                                                                                                                                                                                                                                                                                                                                                                                                                                                                                                                                                                                                                                                                                                                                                                                                                                                                                                                              | Results to Jan, 2023 |
|---------------------------------|--------------------------------------------------------------------------------------------------------------------------------------------------------------------------------------------------------------------------------------------------------------------------------------------------------------------------------------------------------------------------------------------------------------------------------------------------------------------------------------------------------------------------------------------------------------------------------------------------------------------------------------------------------------------------------------------------------------------------------------------------------------------------------------------------------------------------------------------------------------------------------------------------------------------------------------------------------------------------------------------------------------------------------------------------------------------------------------------------------------------------------------------------------------------------------------------------------------------------------------------------------------------------------------------------------------------------------------------------------------------------------------------------------------------------------------------------------------------------------------------------------------------------------------------------------------------------------------------------------------------------------------------------------------------------------------------------------------------------------------------------------------------------------------------------------------------------------------------------------------------------------------------------------------------------------------------------------------------------------------------------------------------------------------------------------------------------------------------------------------------------------|----------------------|
|                                 | or "掌振法" or "指拨法" or "正骨" or "推扳法" or "关节松解术" or "关节松动术" or "关节拉伸" or "颅底椎技术" or "高速低振幅" or "整脊" or "捏脊" or "手法治疗"))                                                                                                                                                                                                                                                                                                                                                                                                                                                                                                                                                                                                                                                                                                                                                                                                                                                                                                                                                                                                                                                                                                                                                                                                                                                                                                                                                                                                                                                                                                                                                                                                                                                                                                                                                                                                                                                                                                                                                                                                           |                      |
| WanFang<br>(Translated Version) | (Topic:( <i>"Dysmenorrhea"</i> or <i>"Menstrual Pain"</i> or <i>"Primary Dysmenorrhea"</i> or <i>"Menstrual Period Pain"</i> ) AND Topic:( <i>"Control"</i> or <i>"Random"</i> or <i>"Semi-Random"</i> or <i>"Experimental Group"</i> or <i>"Intervention Group"</i> or <i>"Treatment Group"</i> or <i>"Grouping"</i> or <i>"Two Groups"</i> or <i>"Inter-group"</i> or <i>"Observation"</i> or <i>"Clinical"</i> or <i>"Case"</i> ) AND Topic:( <i>"Massage"</i> or <i>"Manipulation"</i> or <i>"Rubbing"</i> or <i>"Finger Zen"</i> or <i>"Acupoint"</i> or <i>"Ointment Rubbing"</i> or <i>"Rubbing Technique"</i> or <i>"Palm Vibration Technique"</i> or <i>"Finger Pressing Technique"</i> or <i>"Orthopedics"</i> or <i>"Push-Pull Technique"</i> or <i>"Joint Loosening Procedure"</i> or <i>"Joint Mobilization Procedure"</i> or <i>"Joint Stretching"</i> or <i>"Suboccipital Technique"</i> or <i>"High-Speed Low-Amplitude"</i> or <i>"Chiropractic Adjustment"</i> or <i>"Spinal Pinching"</i> or <i>"Massage Therapy"</i> )) OR (Title or Keywords:( <i>"Dysmenorrhea"</i> or <i>"Menstrual Pain"</i> or <i>"Primary Dysmenorrhea"</i> or <i>"Menstrual Period Pain"</i> ) AND Title or Keywords:( <i>"Control"</i> or <i>"Random"</i> or <i>"Semi-Random"</i> or <i>"Experimental Group"</i> or <i>"Intervention Group"</i> or <i>"Treatment Group"</i> or <i>"Grouping"</i> or <i>"Two Groups"</i> or <i>"Inter-group"</i> or <i>"Observation"</i> or <i>"Clinical"</i> or <i>"Case"</i> ) AND Title or Keywords:( <i>"Massage"</i> or <i>"Manipulation"</i> or <i>"Rubbing"</i> or <i>"Finger Zen"</i> or <i>"Acupoint"</i> or <i>"Ointment Rubbing"</i> or <i>"Rubbing Technique"</i> or <i>"Palm Vibration Technique"</i> or <i>"Finger Pressing Technique"</i> or <i>"Orthopedics"</i> or <i>"Push-Pull Technique"</i> or <i>"Joint Loosening Procedure"</i> or <i>"Joint Mobilization Procedure"</i> or <i>"Joint Stretching"</i> or <i>"Suboccipital Technique"</i> or <i>"High-Speed Low-Amplitude"</i> or <i>"Chiropractic Adjustment"</i> or <i>"Spinal Pinching"</i> or <i>"Massage Therapy"</i> )) | 588                  |
| CNKI                            | SU=( <i>'推拿'</i> + <i>'手法'</i> + <i>'按摩'</i> + <i>'一指禅'</i> + <i>'点穴'</i> + <i>'膏摩'</i> + <i>'按揉法'</i> + <i>'掌振法'</i> + <i>'指拨法'</i> + <i>'正骨'</i> + <i>'推扳法'</i> + <i>'关节松解术'</i> + <i>'关节松动术'</i> + <i>'关节拉伸'</i> + <i>'颅底椎技术'</i> + <i>'高速低振幅'</i> + <i>'推拿治疗'</i> + <i>'整脊'</i> + <i>'捏脊'</i> + <i>'手法治疗'</i> + <i>'按摩治疗'</i> ) OR TKA=( <i>'推拿'</i> + <i>'手法'</i> + <i>'按摩'</i> + <i>'一指禅'</i> + <i>'点穴'</i> + <i>'膏摩'</i> + <i>'按揉法'</i> + <i>'掌振法'</i> + <i>'指拨法'</i> + <i>'正骨'</i> + <i>'推扳法'</i> + <i>'关节松解术'</i> + <i>'关节松动术'</i> + <i>'关节拉伸'</i> + <i>'颅底椎技术'</i> + <i>'高速低振幅'</i> + <i>'推拿治疗'</i> + <i>'整脊'</i> + <i>'捏脊'</i> + <i>'手法治疗'</i> + <i>'按摩治疗'</i> ) AND SU=( <i>'痛经'</i> + <i>'月经痛'</i> + <i>'经期疼痛'</i> + <i>'原发性痛经'</i> ) AND SU=( <i>'对照'</i> + <i>'随机'</i> + <i>'半随机'</i> + <i>'实验组'</i> + <i>'试验组'</i> + <i>'干预组'</i> + <i>'分组'</i> + <i>'两组'</i> + <i>'三组'</i> + <i>'组间'</i> + <i>'观察'</i> + <i>'临床'</i> + <i>'例'</i> )                                                                                                                                                                                                                                                                                                                                                                                                                                                                                                                                                                                                                                                                                                                                                                                                                                                                                                                                                                                                                                                                                                                                                                           | 432                  |
| CNKI<br>(Translated Version)    | SU = ( <i>'Massage'</i> + <i>'Manipulation'</i> + <i>'Rubbing'</i> + <i>'Finger Zen'</i> + <i>'Acupoint'</i> + <i>'Ointment Rubbing'</i> + <i>'Rubbing Technique'</i> + <i>'Palm Vibration Technique'</i> + <i>'Finger Pressing Technique'</i> + <i>'Orthopedics'</i> + <i>'Push-Pull Technique'</i> + <i>'Joint Loosening Procedure'</i> + <i>'Joint Mobilization Procedure'</i> + <i>'Joint Stretching'</i> + <i>'Suboccipital Technique'</i> + <i>'High-Speed Low-Amplitude'</i> + <i>'Massage Therapy'</i> + <i>'Chiropractic Adjustment'</i> + <i>'Spinal Pinching'</i> + <i>'Manipulative Therapy'</i> + <i>'Massage Treatment'</i> ) OR TKA = ( <i>'Massage'</i> + <i>'Manipulation'</i> + <i>'Rubbing'</i> + <i>'Finger Zen'</i> + <i>'Acupoint'</i> + <i>'Ointment Rubbing'</i> + <i>'Rubbing Technique'</i> + <i>'Palm Vibration Technique'</i> + <i>'Finger</i>                                                                                                                                                                                                                                                                                                                                                                                                                                                                                                                                                                                                                                                                                                                                                                                                                                                                                                                                                                                                                                                                                                                                                                                                                                                     | 432                  |

**Table S2 The search strategies of electronic database**

| Database                    | Search strategies                                                                                                                                                                                                                                                                                                                                                                                                                                                                                                                                                                                                                                                                                                                                          | Results to Jan, 2023 |
|-----------------------------|------------------------------------------------------------------------------------------------------------------------------------------------------------------------------------------------------------------------------------------------------------------------------------------------------------------------------------------------------------------------------------------------------------------------------------------------------------------------------------------------------------------------------------------------------------------------------------------------------------------------------------------------------------------------------------------------------------------------------------------------------------|----------------------|
|                             | Pressing Technique' + 'Orthopedics' + 'Push-Pull Technique' + 'Joint Loosening Procedure' + 'Joint Mobilization Procedure' + 'Joint Stretching' + 'Suboccipital Technique' + 'High-Speed Low-Amplitude' + 'Massage Therapy' + 'Chiropractic Adjustment' + 'Spinal Pinching' + 'Manipulative Therapy' + 'Massage Treatment') AND SU = ('Dysmenorrhea' + 'Menstrual Pain' + 'Menstrual Period Pain' + 'Primary Dysmenorrhea') AND SU = ('Control' + 'Random' + 'Semi-Random' + 'Experimental Group' + 'Test Group' + 'Intervention Group' + 'Grouping' + 'Two Groups' + 'Three Groups' + 'Inter-group' + 'Observation' + 'Clinical' + 'Case')                                                                                                                |                      |
| VIP                         | M=(推拿 OR 手法 OR 按摩 OR 一指禅 OR 点穴 OR 膏摩 OR 按揉法 OR 掌振法 OR 指拨法 OR 正骨 OR 推扳法 OR 关节松解术 OR 关节松动术 OR 关节拉伸 OR 颅底椎技术 OR 高速低振幅 OR 推拿治疗 OR 整脊 OR 捏脊 OR 手法治疗 OR 按摩治疗)AND M=(痛经 OR 月经痛 OR 经期疼痛 OR 原发性痛经)AND M=(对照 OR 随机 OR 半随机 OR 实验组 OR 试验组 OR 干预组 OR 分组 OR 两组 OR 三组 OR 组间 OR 观察 OR 临床 OR 例)                                                                                                                                                                                                                                                                                                                                                                                                                                                                             | 226                  |
| VIP<br>(Translated Version) | M = (Massage OR Manipulation OR Rubbing OR Finger Zen OR Acupoint OR Ointment Rubbing OR Rubbing Technique OR Palm Vibration Technique OR Finger Pressing Technique OR Orthopedics OR Push-Pull Technique OR Joint Loosening Procedure OR Joint Mobilization Procedure OR Joint Stretching OR Suboccipital Technique OR High-Speed Low-Amplitude OR Massage Therapy OR Chiropractic Adjustment OR Spinal Pinching OR Manipulative Therapy OR Massage Treatment) AND M = (Dysmenorrhea OR Menstrual Pain OR Menstrual Period Pain OR Primary Dysmenorrhea) AND M = (Control OR Random OR Semi-Random OR Experimental Group OR Test Group OR Intervention Group OR Grouping OR Two Groups OR Three Groups OR Inter-group OR Observation OR Clinical OR Case) | 226                  |

**Table S3 Summary table of Sensitive analyses**

| Inclusion factors                                       | Manual therapy versus no treatment            |                        |                                    |                        | Manual therapy versus NSAIDs                     |                        |                                               |                         |
|---------------------------------------------------------|-----------------------------------------------|------------------------|------------------------------------|------------------------|--------------------------------------------------|------------------------|-----------------------------------------------|-------------------------|
|                                                         | Pain intensity<br>(MD, 95%CI, numbers trials) |                        | MDQ<br>(MD, 95%CI, numbers trials) |                        | Pain intensity<br>(MD, 95%CI, numbers of trials) |                        | Effective rate<br>(RR, 95%CI, numbers trials) |                         |
|                                                         | sensitive analysis                            | total meta analysis    | sensitive analysis                 | total meta analysis    | sensitive analysis                               | total meta analysis    | sensitive analysis                            | total meta analysis     |
| Sample size $\geq$ 30                                   | 0.70 [0.19, 1.20]<br>6                        | 0.81 [0.35, 1.28]<br>8 | 3.67 [2.02, 5.31]<br>3             | 3.84 [2.27, 5.40]<br>4 | 1.65 [0.47, 2.84]<br>5                           | 3.01 [1.08, 4.94]<br>9 | 4.77 [3.17, 7.17]<br>9                        | 4.87 [3.29, 7.20]<br>11 |
| Explicit randomization procedure of contact information | 0.59 [0.06, 1.12]<br>5                        | 0.81 [0.35, 1.28]<br>8 | 3.47 [1.05, 5.89]<br>1             | 3.84 [2.27, 5.40]<br>4 | 3.26 [0.74, 5.79]<br>6                           | 3.01 [1.08, 4.94]<br>9 | 7.91 [3.84, 16.30]<br>5                       | 4.87 [3.29, 7.20]<br>11 |
